# Supplementary material for: Molecular Recognition of the HPLC Whelk-O1 Selector towards the Conformational Enantiomers of Nevirapine and Oxcarbazepine
Source: PubMed Central journal article supplement (PMC7796420; doi:10.3390/ijms22010144), 2020-12-25
Supplement: ijms-22-00144-s001.pdf [file ijms-22-00144-s001.pdf]

## Supporting information

### 1.NMR spectra

$^1\text{H}$ NMR nevirapine

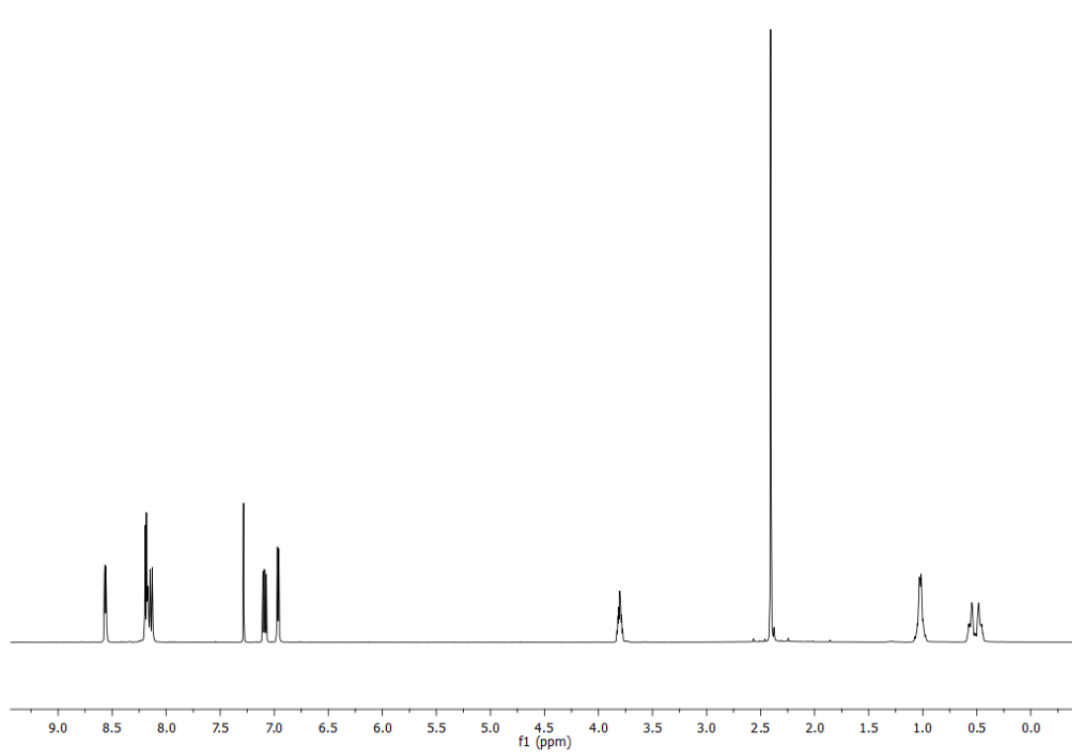

$^1\text{H}$ NMR (R,R)WhelkO1

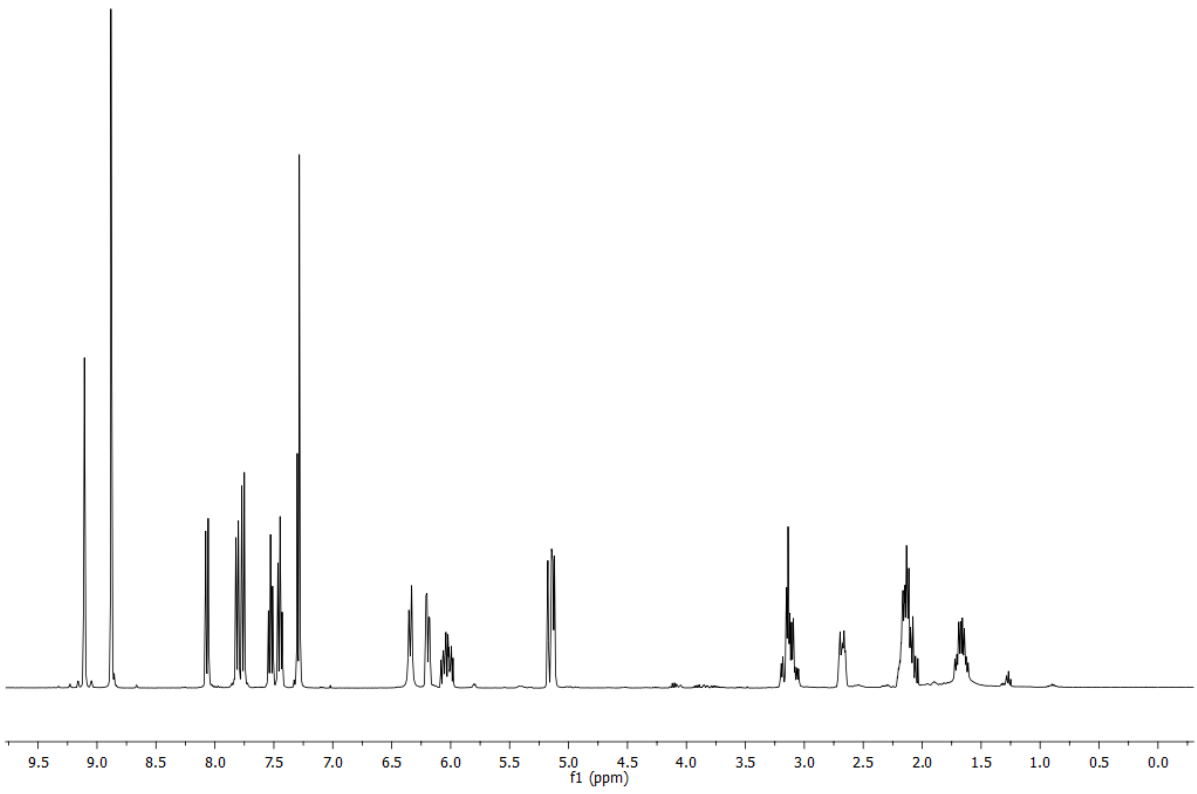

<sup>1</sup>HNMR Nevirapine + saturated solution of (R,R)whelk01

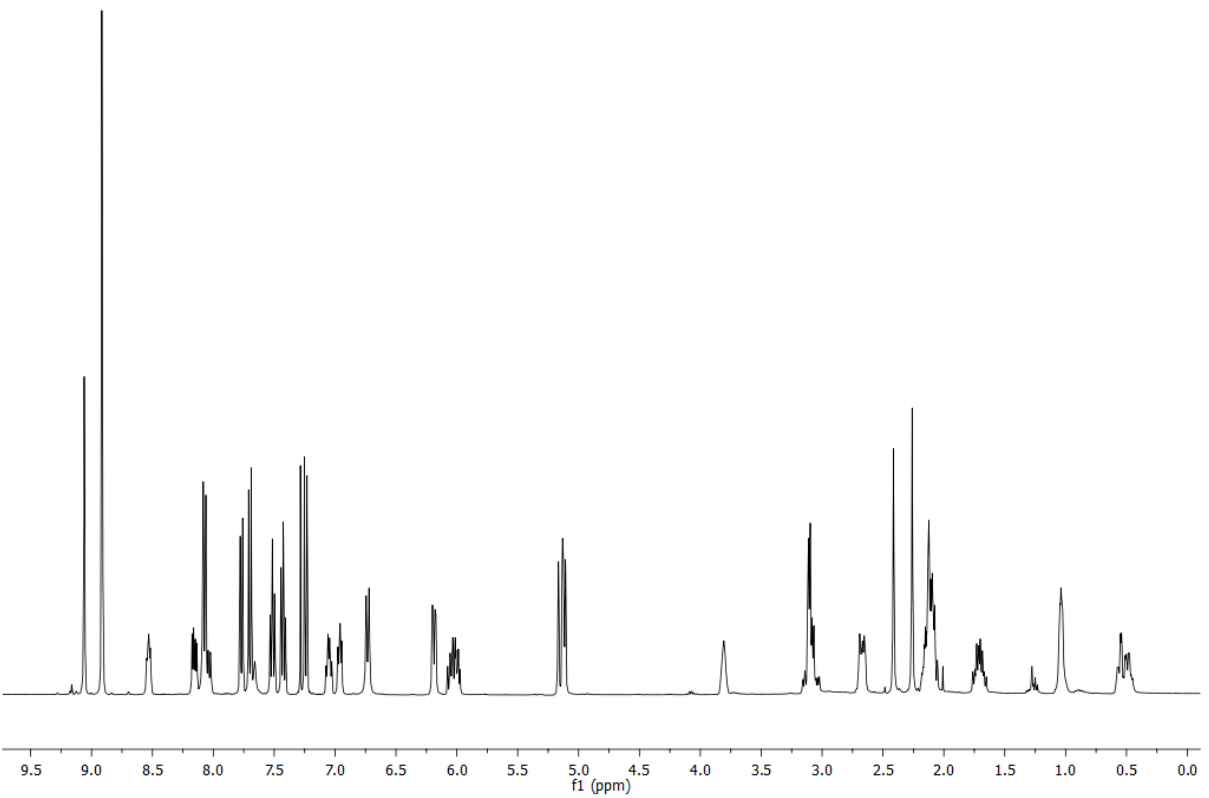

<sup>1</sup>HNMR Oxcarbazepine

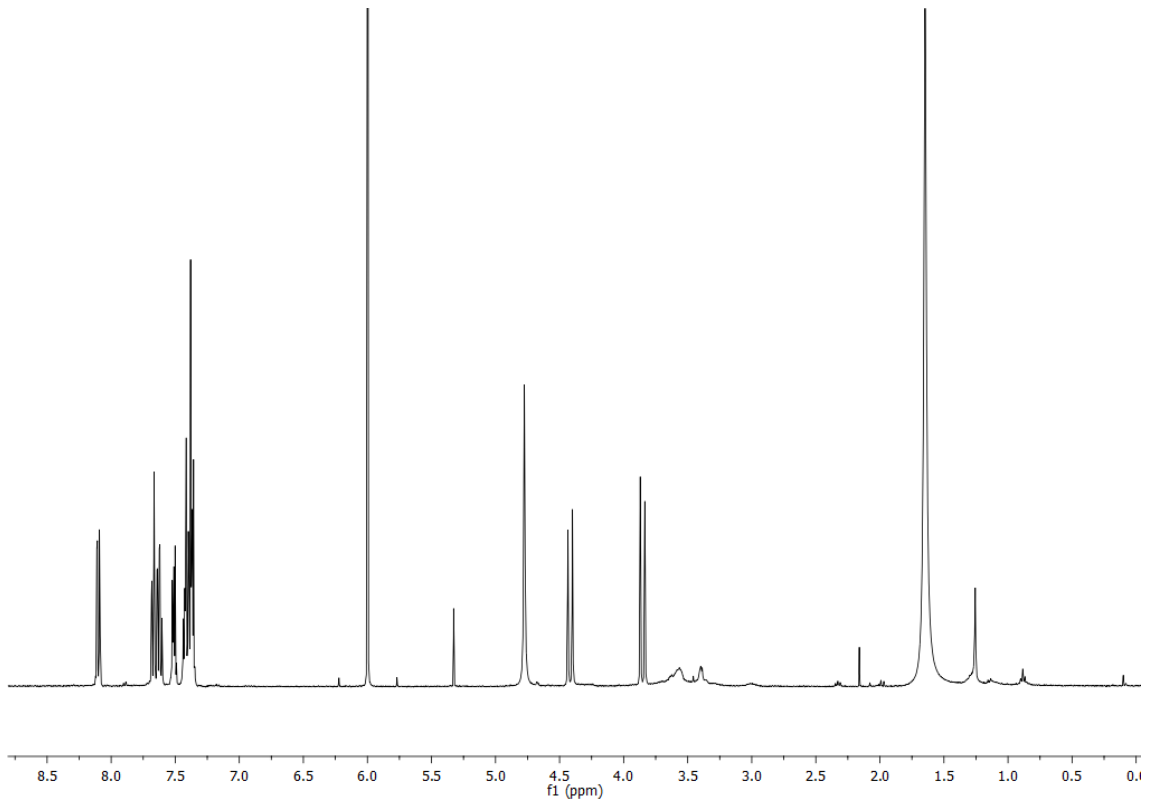

VT-NMR of oxcarbazepine

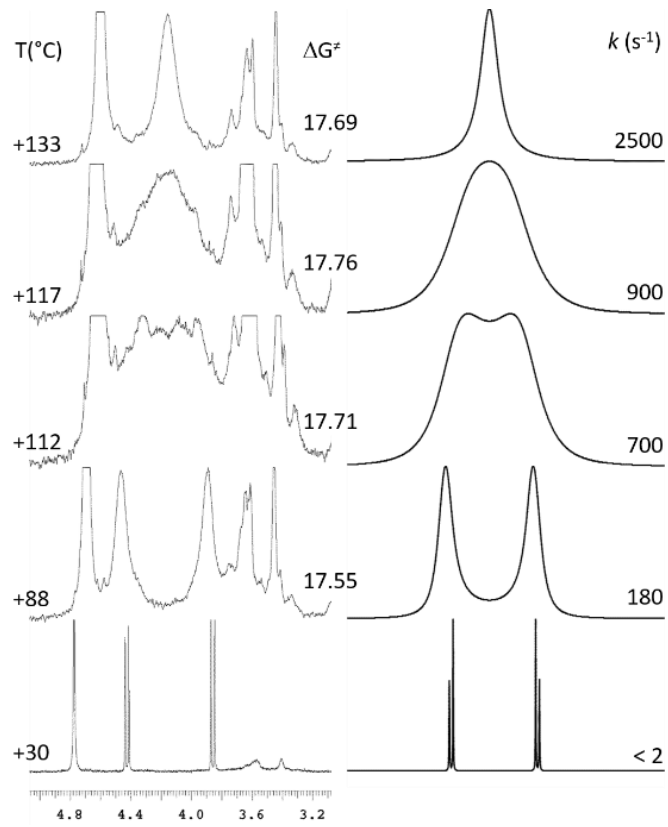

## 2. Simulated VT-HPLC profiles

### 2.1 Nevirapine

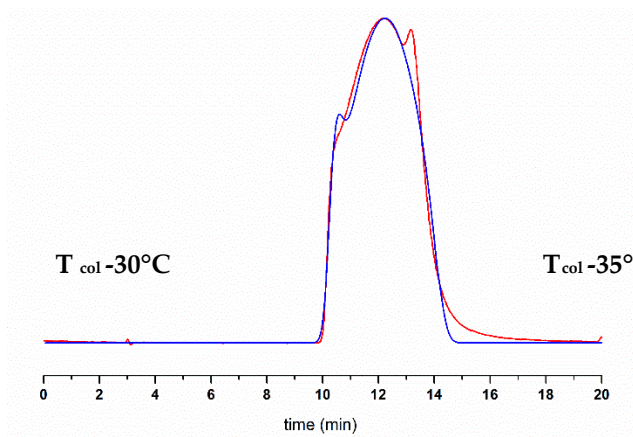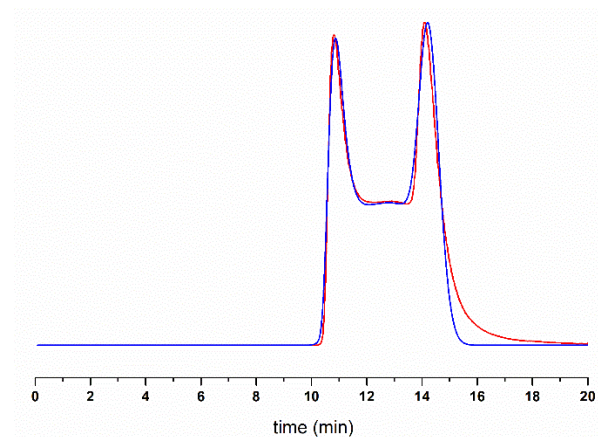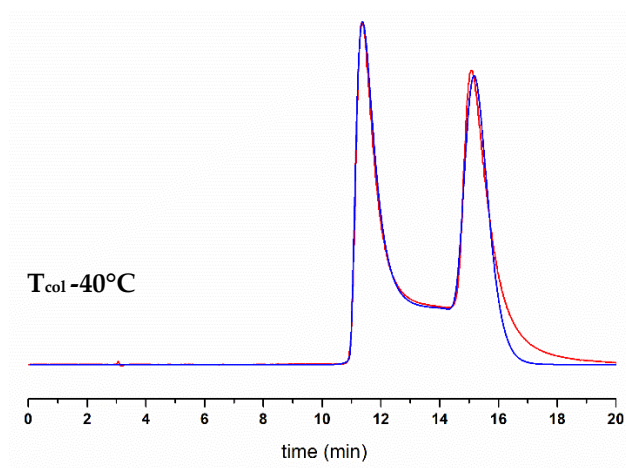

| T°C | $k_{app\ 1,2}$ (min <sup>-1</sup> ) | $k_{app\ 2,1}$ (min <sup>-1</sup> ) | $\Delta G_{app}^\ddagger_{1,2}$ (kcal/mol) | $\Delta G_{app}^\ddagger_{2,1}$ (kcal/mol) |
|-----|-------------------------------------|-------------------------------------|--------------------------------------------|--------------------------------------------|
| -30 | 0,231                               | 0.171                               | 16.82                                      | 16.96                                      |
| -35 | 0.073                               | 0.055                               | 17.01                                      | 17.14                                      |
| -40 | 0.076                               | 0.057                               | 17.08                                      | 17.22                                      |

## 2.1 Oxcarbazepine

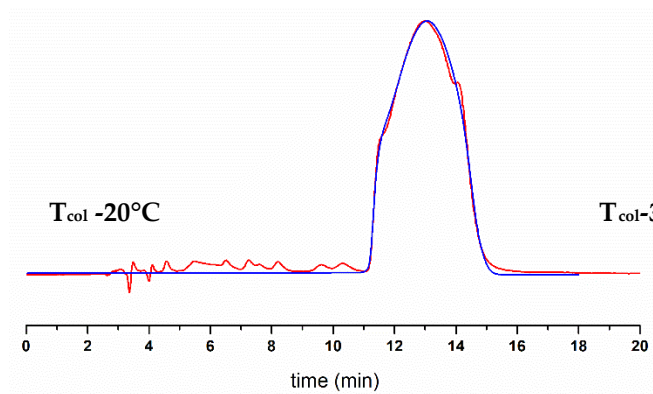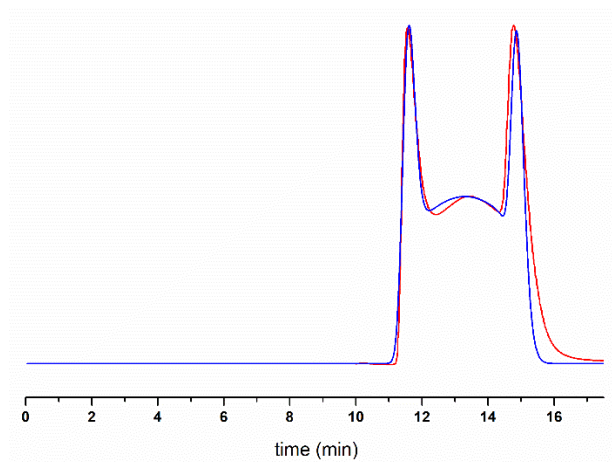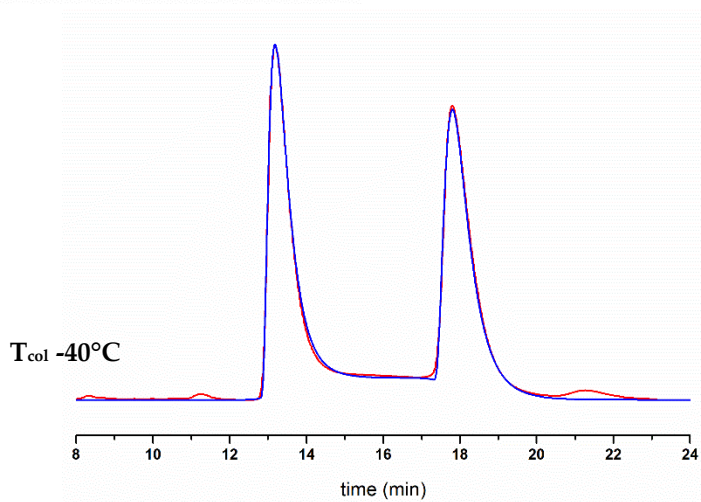

| $T^{\circ}\text{C}$ | $k_{app\ 1,2} (\text{min}^{-1})$ | $k_{app\ 2,1} (\text{min}^{-1})$ | $\Delta G_{app\ 1,2}^{\ddagger} (\text{kcal/mol})$ | $\Delta G_{app\ 2,1}^{\ddagger} (\text{kcal/mol})$ |
|---------------------|----------------------------------|----------------------------------|----------------------------------------------------|----------------------------------------------------|
| -20                 | 0.216                            | 0.196                            | 17.55                                              | 17.68                                              |
| -30                 | 0.096                            | 0.075                            | 17.45                                              | 17.45                                              |
| -40                 | 0.014                            | 0.010                            | 17.39                                              | 17.53                                              |

### 3. Geometries of ground state and transition state for NVP and OXC

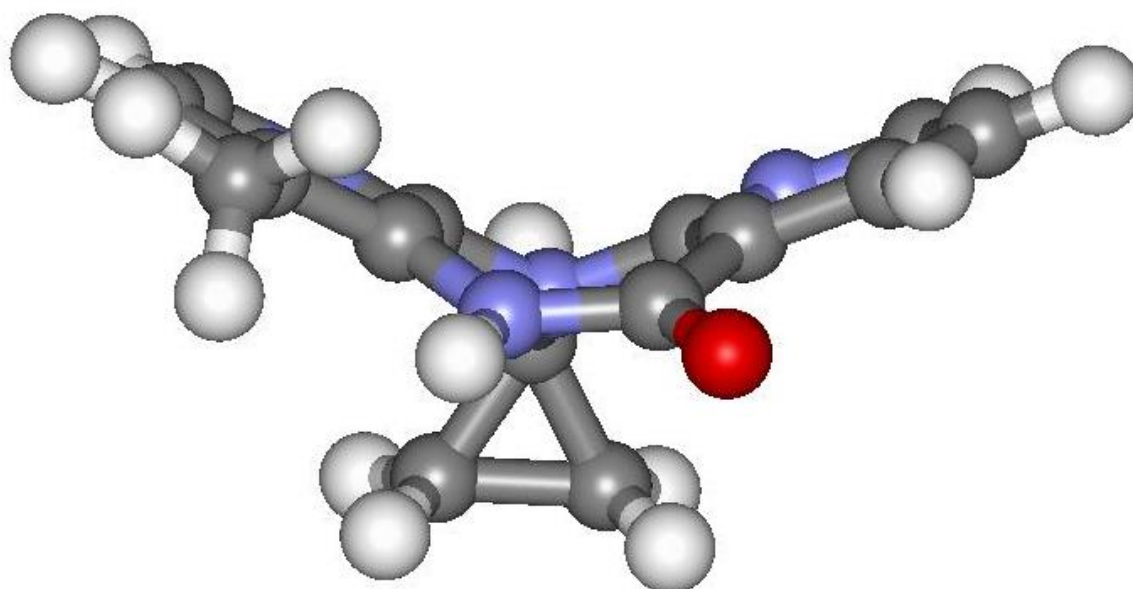

Ground state geometry found for Nevirapine NVP

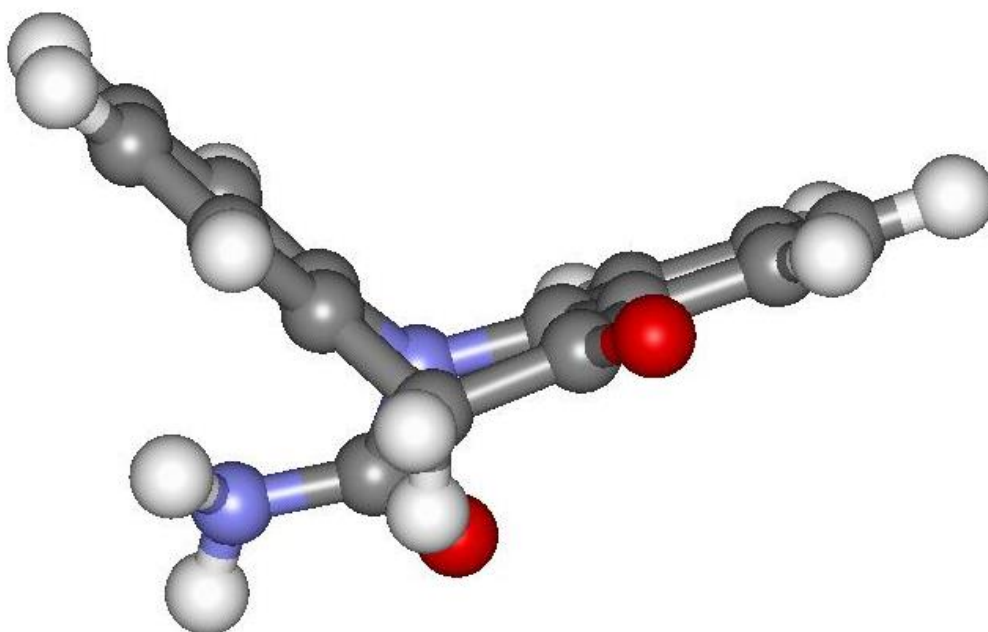

Ground state geometry found for Oxacarbazepine OXC

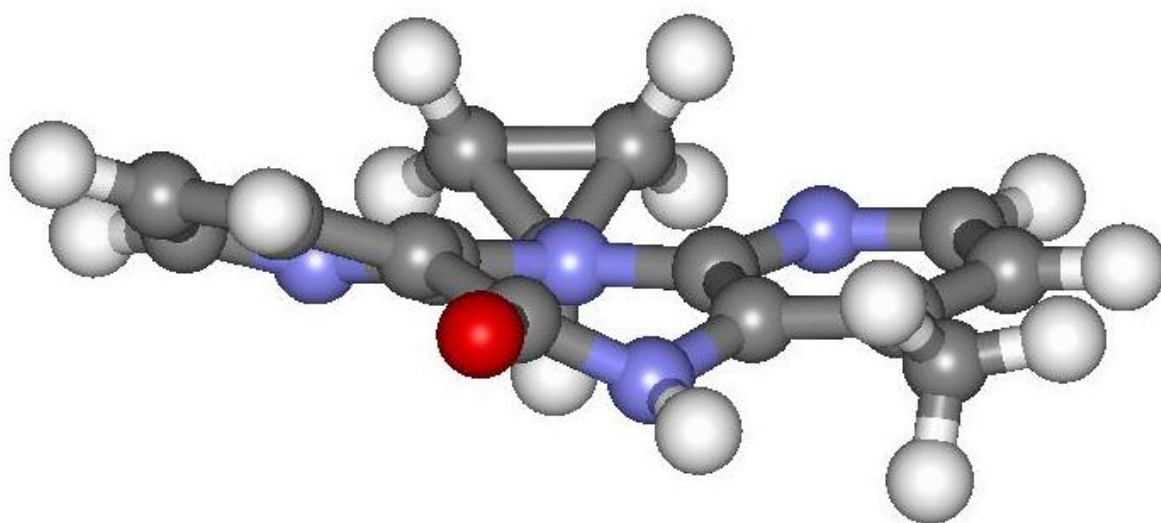

**Transition state geometry found for Nevirapine NVP enantiomerization**



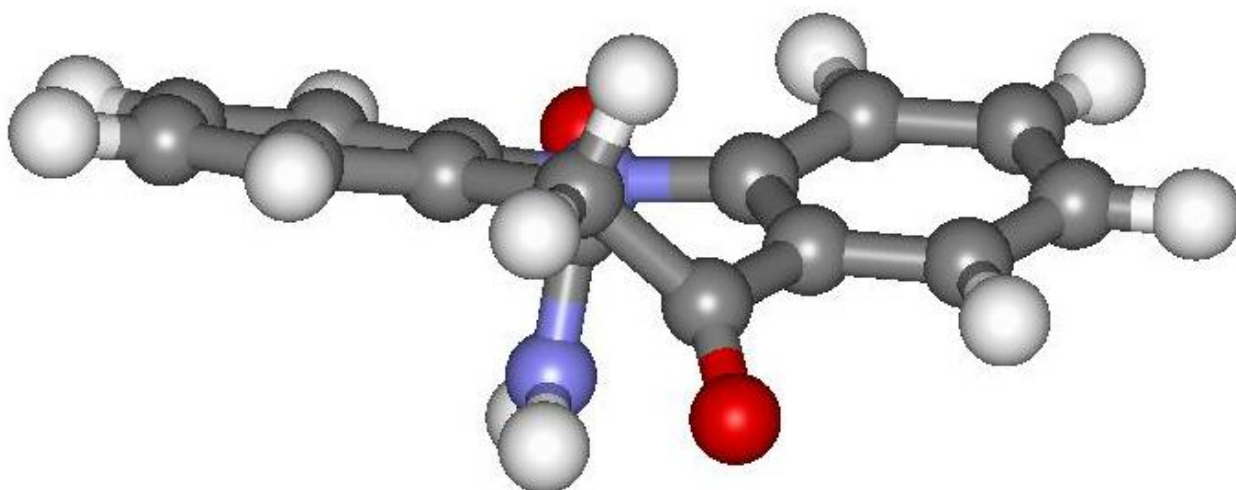

Transition state geometry found for Oxacarbazepine OXC enantiomerization

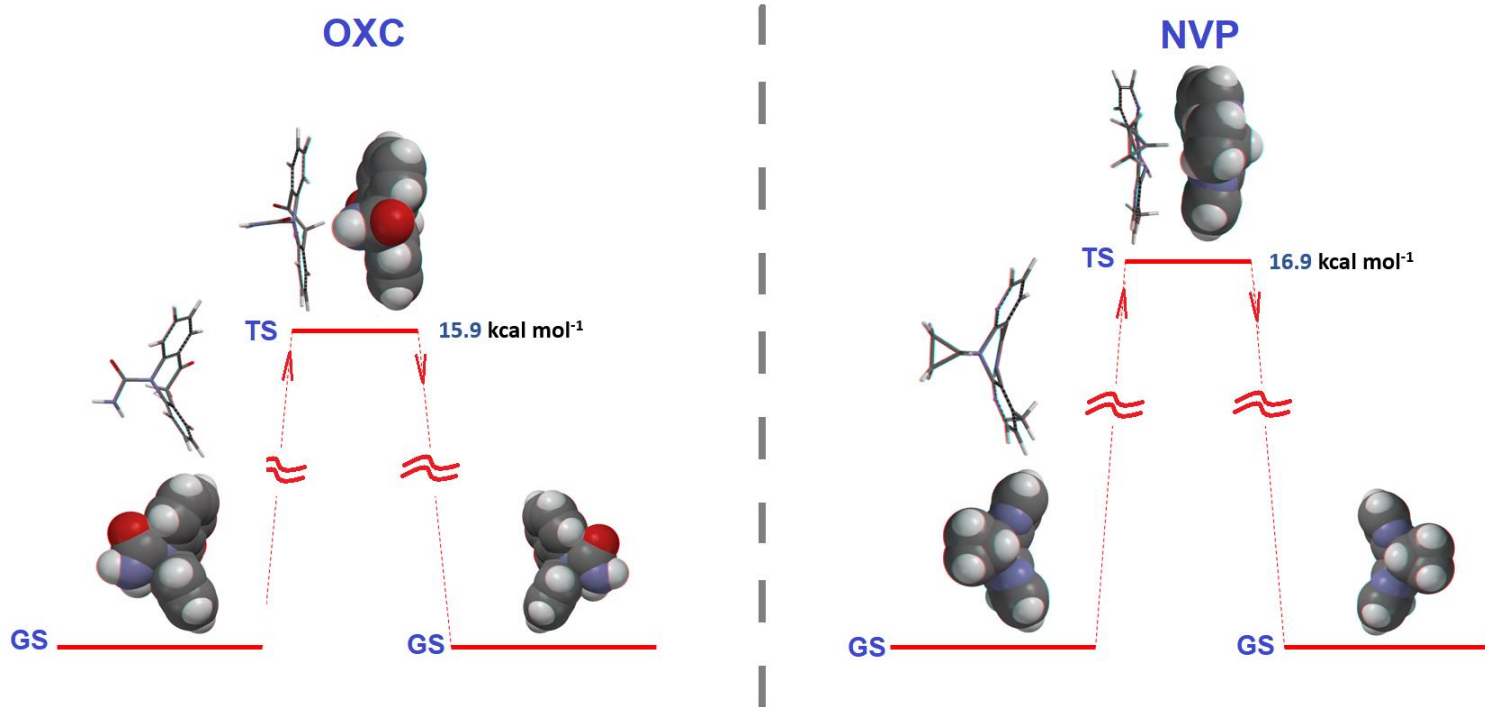

Enantiomerization barriers found for Oxacarbazepine OXC (left) and Nevirapine NVP (right)
